1 **Reviews and Syntheses**

2 **Running title:** Changes in fish biodiversity in regulated ecosystems

3 **Dams have varying impacts on fish communities across latitudes: A quantitative**  
4 **synthesis**

5 **Katrine Turgeon**\*<sup>1,2</sup>, Christian Turpin<sup>2</sup> and Irene Gregory-Eaves<sup>1</sup>

6 **Affiliations:** <sup>1</sup>McGill University, Department of Biology, 1205 Docteur Penfield Avenue,  
7 Montreal, Québec, CANADA, H3A 1B1; <sup>2</sup>Hydro-Québec, Governance and Strategic Issues, 75  
8 René-Lévesque, Montréal, QC, CANADA, H2Z 1A4

9 \*Corresponding author: [katrine.turgeon@uqo.ca](mailto:katrine.turgeon@uqo.ca), 1 514 442-7770

10 Emails of co-authors: [turpin.christian@hydro.qc.ca](mailto:turpin.christian@hydro.qc.ca), [irene.gregory-eaves@mcgill.ca](mailto:irene.gregory-eaves@mcgill.ca)

11

12 **Keywords:** Impoundment, reservoirs, fish, hydroelectricity, meta-analysis, tropical, biomes,  
13 rheophilic, trophic level position, species assemblages, invasive

14 Number of words in the abstract: 200 words; Number of words in the main text: 6635 words;

15 Number of words in text boxes: 0; Number of references: 134; number of figures: 5; Number of  
16 tables: 0

17 **Statement of authorship:** KT performed the literature review and the meta-analyses, KT wrote  
18 the first draft of the manuscript and CT and IGE contributed substantially to revisions.

19 **Data accessibility statement:** Should the manuscript be accepted, the data supporting the results  
20 will be archived in Figshare and the data DOI will be included at the end of the article.

21 **Abstract**

22 Dams are recognized to impact aquatic biodiversity and ecosystem functions, but the  
23 magnitude of effects vary across studies. By using a meta-analytical approach, we examined the  
24 effects of impoundment on fish community across three large biomes. The impacts of dams on  
25 richness and diversity differed across biomes, with significant declines in the tropics, lower  
26 amplitude but similar directional changes in temperate reservoirs, and no changes in boreal  
27 reservoirs. Our analysis also showed that non-native species increased significantly in tropical  
28 and temperate reservoirs, but not in boreal reservoirs. In contrast, temporal trajectories in fish  
29 assemblage metrics were common across regions, with all biomes showing an increase in mean  
30 trophic position and in the proportion of generalist species after impoundment. Such changes in  
31 fish assemblages may affect food web stability and merit closer study. Across the literature  
32 examined, predominant factors or mechanisms that render fish assemblages susceptible to  
33 impacts from dams were: 1) the transformation of the lotic environment into a lentic  
34 environment; 2) habitat fragmentation and 3) invasive or non-native species. Collectively our  
35 results highlight that an understanding of the regional context and a suite of metrics are needed to  
36 make robust predictions about how fish will respond to river impoundments.

## 37 **Introduction**

38 Dams are becoming a pervasive feature of the landscape around the globe (Stickler *et al.*  
39 2013; Grill *et al.* 2015) and hydropower has been identified by many as a clean energy source  
40 (Teodoru *et al.* 2012; Liu *et al.* 2013) that could be a major catalyst for driving the move to  
41 decarbonize our global economy (Figueres *et al.* 2017; Potvin *et al.* 2017). However, there is a  
42 clear need to identify where, and by how much dams alter the environment, particularly sensitive  
43 aquatic communities (Strayer & Dudgeon 2010). This is especially important given the  
44 unprecedented boom in dam construction in emerging economies that are mostly located in  
45 species-rich regions (Ziv *et al.* 2012; Stickler *et al.* 2013; Winemiller *et al.* 2016).

46 Large dams (*i.e.*, higher than 15 metres) transform large rivers into storage reservoirs,  
47 changing at least part of the ecosystem from a lotic to a lentic one (Ward & Stanford 1995; Friedl  
48 & Wüest 2002). Upstream and downstream of the dam, the alteration of the hydrological regime  
49 may generate variation in water levels and discharge far beyond natural amplitudes, with changes  
50 varying in magnitude depending on dam purpose and management (Kroger 1973; Zohary &  
51 Ostrovsky 2011). Dams can also fragment rivers by creating partial barriers to migratory  
52 organisms (Nilsson *et al.* 2005; Pelicice *et al.* 2015), or can connect aquatic ecosystems that were  
53 spatially isolated before (Gido *et al.* 2002; Gubiani *et al.* 2010). Thus, the modification of the  
54 quality, diversity, distribution and access of some key habitats should detrimentally affect some  
55 species and favor others (Stanford *et al.* 1996; Zohary & Ostrovsky 2011; Turgeon *et al.* 2018).  
56 Ultimately, dams can affect the biodiversity, ecosystem services, and the functions of the  
57 associated regulated ecosystems (Nilsson *et al.* 2005; Dudgeon *et al.* 2006; Poff *et al.* 2007;  
58 Vörösmarty *et al.* 2010).

59           The effects of dams on fish have been extensively studied, but divergent effects have  
60    been reported. At regional and global scales, dams can lead to fish fauna homogenization (*i.e.*,  
61    the process by which ecosystems lose their biological uniqueness; Rahel 2000; Poff *et al.* 2007;  
62    Gido *et al.* 2009; Villéger *et al.* 2011; Liermann *et al.* 2012; Vitule *et al.* 2012). At a more local  
63    scale, empirical evidence exists to show that richness and diversity decrease after impoundment,  
64    or are lower in reservoirs (Reyes-Gavilán *et al.* 1996; Pyron *et al.* 1998; Gehrke *et al.* 2002; de  
65    Mérona *et al.* 2005; Sá-Oliveira *et al.* 2015; Lima *et al.* 2016). Conversely, other studies and a  
66    recent meta-analysis (Liew *et al.* 2016) found either no change or an increase in richness and  
67    diversity after impoundment in reservoirs (Martinez *et al.* 1994a; Guenther & Spacie 2006; Irz *et*  
68    *al.* 2006). An increase in non-native species have been observed in several studies, suggesting  
69    that non-natives can made up the difference in total species richness in reservoirs (Martinez *et al.*  
70    1994b; Johnson *et al.* 2008; Gido *et al.* 2009; Clavero & Hermoso 2010; Liew *et al.* 2016).  
71    Convergences among studies also suggest a general decrease in rheophilic species, an increase in  
72    limnophilic and generalist species (Bonner & Wilde 2000a; Taylor *et al.* 2001, 2014), and an  
73    increase in piscivorous fish in reservoirs (Quist *et al.* 2005; Guenther & Spacie 2006; Pelicice &  
74    Agostinho 2008; Winters & Budy 2015; Turgeon *et al.* 2018).

75           Earlier works have provided valuable information regarding the effects of dams on fish  
76    communities, but the divergences observed regarding fish responses to impoundment call for a  
77    global assessment that goes beyond taxonomic indices to include assemblage metrics and  
78    functional indices (Mérona and Vigouroux 2012, Mims and Olden 2013, Lima *et al.* 2017b). The  
79    effects might also vary across latitudes according to the inherent adaptability of fish communities  
80    to respond to the physico-chemical and biological changes brought about by dams and newly  
81    created reservoirs (Rosenberg *et al.* 1997; Gomes & Miranda 2001; Vörösmarty *et al.* 2010).

82 Here, by using meta-analytic approach examining both taxonomic (richness, diversity and  
83 evenness) and fish assemblage metrics (number of non-native species, trophic level position and  
84 macrohabitat flow guild), across latitudes covering three large biomes, we found significant loss  
85 in richness in the tropics and relatively little change in boreal region. We also found a general  
86 change in fish assemblages toward a more generalist and predatory community, globally.

## 87 **Methods**

### 88 **Literature search process**

89 For this study, we used the guidelines and followed the checklist suggested by PRISMA  
90 (Preferred Reporting Items for Systematic Reviews and Meta-Analyses; Moher *et al.* 2009). The  
91 studies presented in this synthesis were compiled from journals indexed in Thomson ISI's Web  
92 of Knowledge (mostly peer-reviewed articles; resulting in 668 publications) and from Google  
93 Scholar (*i.e.* peer-reviewed articles and textbooks, as well as government and industry reports,  
94 non-peer reviewed journals and conference proceedings). We searched for references including  
95 the following keywords, individually or in combination: “reservoir\*”, “dam\*”, “impound\*”,  
96 “regulat\*” but the search included “fish\*” at all times. Extensive searches were performed  
97 between October 2014 and June 2017 on the references available at that time and published  
98 between 1900 and 2017. In addition, the reference lists and bibliographies of relevant sources  
99 were also scanned to find literature that was not identified through Thomson ISI's Web of  
100 Knowledge and Google Scholar (mostly reports from the grey literature).

101 We then screened our database to refine our selection criteria to include only references that  
102 had quantitative data of the effects of impoundment on fish community. We thus excluded  
103 modelling and simulation exercises. A total of 67 references met our selection criteria (see

104 Appendix S1; Table S1.1). We then classified each reference as being longitudinal (*i.e.*, one or a  
105 few reservoirs with data before and after impoundment; No. of references = 47, No. of sites =  
106 147) or cross-sectional (*i.e.*, study presenting data on numerous reservoirs and unregulated  
107 aquatic ecosystems sampled at a single point in time; No. of references = 21, No. of sites = 37).

## 108 **Data extraction**

109 Data were mostly extracted from tables or from datasets available in appendices and  
110 supplemental material. When data were presented in figures, they were extracted using the  
111 WebPlotDigitizer software (Rohatgi 2018). From longitudinal references, we extracted data for  
112 each reservoir and/or each sampling stations separately (*e.g.*, downstream and upstream of the  
113 dam) which sometimes resulted in more than one study site per reference (147 studies from 47  
114 references; Table S1.1). The analysis was performed at the study site level for longitudinal  
115 studies. From each longitudinal study, in addition to fish data over time, we consistently  
116 recorded: 1) the archetype of the reservoir visually assessed (lake-shaped, dendritic and canyon;  
117 Appendix S2, Fig. S2.1), 2) the geographic location (longitude and latitude), 3) the freshwater  
118 ecoregion (Abell *et al.* 2008; <http://www.feow.org/>), 4) the location of the sampling station  
119 (downstream, upstream of the dam or upstream of the reservoir), 5) the distance from the dam, 6)  
120 the duration of the study, 7) the area of the reservoir at full pool, 8) the flooded terrestrial area, 9)  
121 the catchment area (or watershed area), 10) the main reservoir usage (hydroelectricity, water  
122 storage, irrigation, flood control, multi-purpose) and 11) the main mechanisms reported by the  
123 authors to be responsible of the observed change in diversity or fish assemblages (Table S1.1).  
124 We aimed to collect a similar set of data from the 47 cross-sectional studies, including: 1) the  
125 geographic location (longitude and latitude), 2) the freshwater ecoregion(s), 3) the location of the  
126 sampling stations, 4) the area of the reservoir and reference lakes when available, 5) key dates

127 including the date at which the reservoir was created, the date at which the river or lake was  
128 impounded and the date at which the reservoir reached its full pool, and 6) the main mechanisms  
129 responsible of the observed change in assemblages (Table S1.1). In cases where these data were  
130 not presented in the original references, we attempted to find these data from alternative sources  
131 (e.g., Google Earth or other published studies focused on the same target ecosystem). See  
132 Appendix S2 (Fig. S2.2) for a graphical summary of the dataset.

### 133 *Calculation of the taxonomic metrics*

134 *Richness* – Richness values (i.e., the number of fish species) were provided in all studies.  
135 We also used  $\ln$  values of richness, where trends can be interpreted as an estimation of  
136 proportional changes per biome when values lie between -1 and 1. *Diversity* – Values of  
137 diversity were directly provided in only three studies. However, many references had data on  
138 relative abundance of the species in the community (24/47 studies for longitudinal and 17/37  
139 studies in cross-sectional studies). We used these relative abundance data to calculate diversity,  
140 evenness, the mean trophic level position and macrohabitat flow guild. We calculated diversity  
141 by using the Shannon's H' diversity index ( $H' = -\sum_{i=1}^R p_i \ln p_i$ ), The Shannon's H' takes  
142 evenness and species richness into account and quantifies the uncertainty in predicting the  
143 species identity of an individual that is taken at random from the dataset and where  $p_i$  is the  
144 proportion of individuals belonging to the  $i^{\text{th}}$  species in the dataset. *Evenness* – We calculated  
145 evenness by using the Pielou's J' Evenness index. Pielou's J' ( $J' = \frac{H'}{\ln S}$ ) ranges from near 0  
146 (indicating pronounced dominance) to near 1 (indicating an almost equal abundance of all  
147 species) and H' is the Shannon's H' diversity index where S is the total number of species.

### 148 *Calculation of the change in fish assemblages' metrics*

149 *Non-native species* – When provided, we extracted the number of non-native species  
150 observed. In this contribution, a non-native species consisted of a species that is introduced  
151 beyond its native range as a direct (*e.g.*, stocking angling, bait fish) or indirect result of human  
152 action (elimination of the barrier that connects adjacent aquatic ecosystems through “natural”  
153 dispersal; Jeschke *et al.* 2014). *Trophic level position* - We extracted the mean trophic level  
154 position for each species from FishBase (Froese & Pauly 2015), and we calculated a mean  
155 trophic level position metric using:  $TP = \sum_{i=1}^R p_i TP_i$ , where  $p_i$  is the proportion of individuals  
156 belonging to the  $i^{\text{th}}$  species and  $TP_i$  is the average reported trophic level position for species  $i$ .  
157 *Macrohabitat flow guild* – We first categorized fish species based on their macrohabitat flow  
158 guild (generalist, fluvial facultative or fluvial specialist) by using FishBase (Froese & Pauly  
159 2015) and other articles and books (Scott & Crossman 1973; Travnicek & Maceina 1994;  
160 Quinn & Kwak 2003; Guenther & Spacie 2006; Baumgartner *et al.* 2014; Buckmeier *et al.* 2014;  
161 Lima *et al.* 2017a). Generalists species were coded 1, whereas fluvial facultative taxa were coded  
162 0.5 and fluvial specialists coded 0. We then used this formula to generate an index of  
163 macrohabitat flow guild,  $MFG = \sum_{i=1}^R p_i MFG_i$ , where  $p_i$  is the proportion of individuals  
164 belonging to the  $i^{\text{th}}$  species and  $MFG_i$  is the macrohabitat guild for species  $i$  (the MFG metrics  
165 varies from 0 to 1).

## 166 **Data analysis**

167 We ran separate analyses for longitudinal (data before and after impoundment) and cross-  
168 sectional datasets (data comparing reservoirs and unregulated aquatic ecosystems). For  
169 longitudinal studies, our main goal was to extract trends regarding the impacts of impoundment  
170 over time on fish metric across studies (*i.e.*, metrics ~ time since impoundment). Conventional  
171 meta-analyses rely on the assumption that sampling distributions have known conditional



172 variances (*i.e.*, weight assigned to both the variances and sample sizes from original studies) and  
173 that effect size estimates from different studies are independent (Borenstein *et al.* 2009; Hedges  
174 *et al.* 2010; Gurevitch *et al.* 2018). In our synthesis, we could not satisfy the assumption of  
175 known conditional variance because for many of our longitudinal studies (39%), sample size  
176 variance was unknown or could not be calculated. We were also interested to use sampling  
177 station as our statistical unit (called “studies”) and thus our studies were not independent (some  
178 stations came from the same reservoir). Because of these limitations, we ran Linear Mixed  
179 Effects Models (LMM; lmer function in the lme4 library v.1.1-18-1, Bates *et al.* 2018) that were  
180 weighted by the number of observation in the time series (and assumes that sample size is  
181 inversely related with variance). In addition, the application of LMM allowed us to increase our  
182 power (Hillebrand & Cardinale 2010) and to add a complex structure of covariates in the fixed  
183 effects that cannot be easily implemented in most meta-analysis packages. All analyses were  
184 performed in R (v. 3.3.2; R Core Team 2017).

185         We ran three sets of models to fully understand the observed patterns because we were  
186 really interested in how taxonomic and fish assemblage metrics varied across biomes. We first  
187 ran a model for the combined dataset (where all biomes were combined). Secondly, we ran a  
188 model comparing biomes among each other and used the interaction between time and biome in  
189 the LMM (covariates). Finally, we ran separate models per biome to examine how richness  
190 changes over time per biome, without drawing comparisons among biomes. For the three sets of  
191 models, we used (years | study\_ID/Reservoir\_ID) as random factors, controlling for the effect of  
192 time per study, and where each study was nested in its reservoir (to control for the spatial non-  
193 independence of the studies; similar approaches have been used in Liao *et al.* 2007; Rey Benayas  
194 *et al.* 2009; Vilà *et al.* 2011). The mean effect size for the fixed effects was estimated with

195 Restricted Maximum Likelihood and calculated with Kenward-Roger approximation to  
196 approximate degrees of freedom in mixed effect models (Kenward & Roger 1997) by using the  
197 sjPlot package in R (v. 2.6.0; Lüdtcke & Schwemmer 2018).

198 For the cross-sectional studies, since both variances and sample sizes were available, we  
199 ran conventional weighted meta-analyses. We weighted effect size estimates by their inverse  
200 variance weights, such that studies with higher sample sizes were given more weight by using  
201 (*i.e.*, weights =  $((1/SD)*N)$ , following Borenstein *et al.* 2009; Hedges *et al.* 2010). We assessed  
202 differences in the overall effect size (*e.g.*, if the mean of each metrics differs between regulated  
203 or unregulated ecosystems) by using the Standardized Mean Difference (SMD). For each  
204 biodiversity metric considered in the cross-sectional studies, we also ran three sets of models  
205 (one for the combined effect, one with the interaction term (biome\*effect), and separate models  
206 per biomes). Unfortunately, not enough information was provided for non-native species in  
207 cross-sectional studies.

208 We used regression trees (rpart package, v. 4.1-10, Therneau *et al.* 2018) to explore and  
209 explain the variability observed and residual variance in random effects values (RE) of the mixed  
210 models based on reservoir or sampling station characteristics (when relevant, see Table S1.1 and  
211 Fig. S2.2). Regression trees were pruned by minimizing the cross-validated error to avoid  
212 overfitting (De'ath & Fabricius 2000).

### 213 **Publication bias**

214 We explored the possibility of publication bias by using funnel plots (Appendix S5),  
215 which allow for a visual assessment of whether studies with small effect sizes are missing from  
216 the distribution of all effect sizes (*i.e.*, asymmetry). We also ran Spearman rank correlations to

217 examine the relationship between the standardized effect size and the sample size across studies,  
218 and the relationship between the standardized effect size and the duration of the studies for  
219 longitudinal studies (Rosenberg *et al.* 2000). A significant correlation would indicate a  
220 publication bias whereby larger effect sizes are more likely to be published than smaller effect  
221 sizes, when sample size is small or duration of the study is short.

## 222 **Results**

### 223 **How do impoundments affect fish biodiversity and assemblages? Longitudinal studies**

#### 224 *Taxonomic metrics (Richness, Diversity and Evenness)*

225 Richness and diversity decreased significantly over time when all studies and regions were  
226 combined, but this pattern is observed only in temperate and tropical regions when biomes were  
227 modeled separately (Fig. 1 a, c). Richness and diversity decreased at a much faster rate in  
228 tropical reservoirs when compared to boreal and temperate reservoirs (Time: B vs. TR, boreal  
229 used as the contrast in the model; Fig. 1 a, c). Using  $\ln$  richness, we still observed a decrease  
230 over time in the combined dataset, as well as in temperate and tropical regions (Fig. 1 b), but the  
231 proportional rate of change in richness over time is comparable across biomes (interaction terms  
232 between Time and Biomes are not significant; Fig. 1 b). Evenness did not significantly decrease  
233 over time for the combined dataset. However, we did find that evenness declined significantly in  
234 tropical and temperate regions when biome-specific models were performed (Fig. 1 d).  
235 Compared to boreal reservoirs, evenness was lower and decreased faster in temperate regions  
236 (Fig. 1 d).

#### 237 *Species assemblage metrics (Non-native, Trophic level position and Macrohabitat flow guild)*

238 Across all analyses of species assemblage metrics, we detected different results when the  
239 combined datasets (studies across all biomes) were contrasted with the regionally-specific  
240 analyses. For example, no non-native species were observed in any of the boreal reservoirs  
241 following impoundment, but some invaded tropical and temperate reservoirs (Fig. 2 a). The  
242 number of non-native species increased for the combined dataset, but this was driven by tropical  
243 and temperate regions (Fig. 2 a). We found that the rate of change in non-native species  
244 increased much faster in tropical reservoirs than in temperate reservoirs (Fig. 2 a), and this was  
245 still true when the proportional rate of increase in non-native species was considered (Fig. 2 b).  
246 The average trophic level position increased following impoundment for the combined dataset,  
247 as well as in boreal reservoirs, but not in temperate and tropical reservoirs (Fig. 2 c). The mean  
248 trophic level position was lower in temperate and tropical regions when compared to the boreal,  
249 and the rate of change did not differ across regions (Fig. 2 c). We observed an increase in  
250 generalist species over time in boreal and tropical regions as well as in the combined dataset (but  
251 did not in temperate region alone; Fig. 2 d). Compared to boreal reservoirs, temperate and  
252 tropical reservoirs had a higher proportion of rheophilic species originally (Fig. 2 d) and the rate  
253 of change in the proportion of generalist species increased more slowly in temperate than in  
254 tropical regions (Fig. 2 f).

#### 255 *Study specific effects (random effect values; RE)*

256 The examination of the study specific effects as random effect values (RE; forest plot)  
257 from the mixed effects models showed a much higher variability in richness in the tropics than in  
258 temperate and boreal regions and showed that residual variances across studies (at the sampling  
259 station level) were comparable within a given reservoir (Appendix S3; Figs. S3.3, and S3.5).  
260 Using a regression tree on the RE of the model built with tropical data only, we found that

261 variation in RE was significantly associated with the catchment area of the reservoirs  
262 (Proportional reduction in error (PRE) = 54.6% of the variation explained) and the duration of  
263 the study (PRE = 9.3%; Fig. 4). Reservoirs with large catchment area showed a tendency to  
264 experience a higher loss of species relative to the mean loss of richness in this region, whereas  
265 young reservoirs with smaller catchment area experienced a lower loss of species, and sometimes  
266 even an increase in richness (Fig. 4). RE values for diversity and evenness did not show this  
267 amount of variability (Fig. S3.6). The examination of the RE values for the number of non-native  
268 species showed some variability in the tropics but very little in boreal and temperate regions  
269 (Fig. S3.7). Variability across studies was not significant in the other species assemblage metrics  
270 (Figs. S3.7 and S3.8).

## 271 **How do impoundments affect fish biodiversity and assemblages? Cross-sectional studies**

### 272 *Diversity metrics (Richness, Diversity and Evenness)*

273 Across the different diversity metrics, we could obtain a substantially larger number of  
274 observations for richness, relative to diversity and evenness. Based on our analyses of the cross-  
275 sectional studies, richness did not differ between regulated (reservoirs and regulated rivers and  
276 streams) and unregulated aquatic ecosystems when all studies and regions were combined.  
277 However, when using separate models, we found higher richness in regulated ecosystems  
278 relative to unregulated ecosystems in temperate region (Fig. 3 a). Diversity was higher in  
279 regulated ecosystems compared to in unregulated ones when tropical and temperate ecosystems  
280 were considered separately (Fig. 3 b). The difference in diversity between regulated and  
281 unregulated ecosystems was greater in temperate region when compared to boreal and tropical  
282 regions (Fig. 3 b). Evenness did not differ between regulated and unregulated aquatic ecosystems  
283 for the combined dataset but was higher in regulated tropical and temperate ecosystems when

284 each biome was considered separately (Fig. 3 c). The examination of the RE values for  
285 taxonomic metrics did not show significant heterogeneity across individual studies (Appendix  
286 S3).

### 287 *Assemblages metrics (Non-native species, Trophic level and Macrohabitat flow guild)*

288 Regarding species assemblage metrics in cross-sectional studies, few patterns were  
289 significant. The average trophic level position did not differ between regulated and unregulated  
290 aquatic ecosystems for the combined dataset, nor did it for the boreal or tropical regions when  
291 examined separately, but was higher in regulated ecosystems in temperate region (Fig. 3 d). The  
292 percentage of generalist species did not differ between regulated and unregulated ecosystems for  
293 the combined dataset, for boreal and temperate regions, but was lower in tropical regulated  
294 ecosystems (Fig. 3 e). We did not have enough data to examine if the number of non-native  
295 species differ between regulated and unregulated ecosystems across all biomes. The examination  
296 of the RE values for species assemblage metrics also did not show significant heterogeneity  
297 across individual studies (Appendix S3).

## 298 **Discussion**

### 299 **Gradient of impacts on biodiversity across latitudes**

300 The impacts of dams on fish biodiversity followed a clear gradient across latitudes, from  
301 a general lack of apparent changes in boreal regions to substantial ones in the tropics. A previous  
302 meta-analysis by Liew *et al.* (2016) suggested that dams have similar effect across regions, but  
303 their analyses did not consider the boreal region. In addition, we report on a substantially larger  
304 pool of information, representing 60% increase in number of references considered by Liew *et*  
305 *al.* (2016). As such, the gradient of effects we report on here clearly underscores the need for an

306 understanding of regional fish assemblages, and the context of stressors when evaluating the  
307 impacts of damming rivers on fish biodiversity.

308 Fish from tropical rivers and temperate prairie streams have evolved in fluvial  
309 ecosystems and most lack the morphological, behavioural and reproductive traits, as well as  
310 plasticity needed to successfully occupy the new lentic habitats created upstream of the dam  
311 (Gomes & Miranda 2001; Dodds *et al.* 2004; Agostinho *et al.* 2008; Durham & Wilde 2011).  
312 Such a lack of traits and plasticity can partly explain the decrease in richness observed over time  
313 in longitudinal studies in tropical and temperate ecosystems. On the other hand, boreal reservoirs  
314 from this synthesis have minimal anthropogenic impacts other than dams due to their remote  
315 locations, and have no reports of non-native species (Sutela & Vehanen 2008; Turgeon *et al.*  
316 2018). Large lakes are also much more common in the boreal region than in temperate and  
317 tropical regions (Verpoorter *et al.* 2014; Messenger *et al.* 2016), and fish have been colonized  
318 boreal aquatic ecosystems from refugia after glaciers began retreating about 15 000 years ago  
319 (Schluter & Rambaut 1996; Griffiths 2006). For these reasons, boreal freshwaters fish fauna is  
320 depauperate and characterized by large body size species that are generally able dispersers and  
321 ecologically-tolerant species (Dynesius & Jansson 2000; Griffiths 2006; L  v  que *et al.* 2008).  
322 Collectively, these characteristics make boreal fish communities potentially quite resilient to  
323 river impoundment.

324 Given the differences in the length of available time series across biomes and the  
325 substantial heterogeneity observed across reservoirs within the tropics, it is important to  
326 scrutinize the data before drawing generalizations about the sensitivity of fish richness and  
327 diversity in impounded tropical systems. Tropical reservoirs are much younger than temperate  
328 and boreal reservoirs, and therefore time series available for the tropics are shorter (*i.e.*, on

329 average 6 years, as opposed to 18 or 19 years as found with boreal regions and temperate  
330 regions, respectively; Fig. S2.2). For completeness, we truncated the time series in temperate and  
331 boreal regions to only keep richness data spanning up to 5 y post-impoundment, and re-analysed  
332 the data (Appendix S4, Fig. S4.10). Even with comparable study periods (5y), richness still  
333 decreased faster in the tropics (Fig. S4.10). We must still be careful with predictions that extend  
334 beyond 10 years in duration in the tropics because they could well be overestimating loss in  
335 richness (Fig. 2 a; dashed line). An alternative and more plausible trajectory would be a  
336 decreasing non-linear curve that stabilizes at some point (Fig. 2 a; saturating curve illustrated),  
337 but the short time series did not allow us to test for non-linear patterns over time. Furthermore,  
338 we observed significant heterogeneity across studies in the tropics when compared to temperate  
339 and boreal regions (Figs. S3.3 and S3.5). This variability across studies was significantly  
340 associated with the size of the catchment area and the duration of the study (Fig 4). A higher  
341 decrease in richness relative to the mean loss of species was observed in reservoirs located in  
342 large catchment area. Rivers in larger catchment areas usually have higher richness (Welcomme  
343 2000; in this study: LMM, estimate  $\pm$  SE =  $0.242 \pm 0.078$ ,  $P = 0.003$ ,  $R^2 = 0.17$ ), and thus had a  
344 higher potential to lose species. A lower loss in richness relative to the mean loss of species or an  
345 increase in richness was observed mostly in short duration time series and can partly be  
346 explained by the short term and rapid increase in non-native species (supported by this meta-  
347 analysis) that were better adapted to the newly created lentic habitats (Rahel 2002; Clavero &  
348 Hermoso 2010; Vitule *et al.* 2012) and may result in biotic homogenisation at larger scales (Poff  
349 *et al.* 2007; Gido *et al.* 2009; Vitule *et al.* 2012). These non-native species can come from newly  
350 connected drainages by the flooding of natural barriers (direct effect; Júlio *et al.* 2009; Clavero &  
351 Hermoso 2010; Vitule *et al.* 2012), or by intentional or unintentional species introduction



352 (indirect effect through propagule pressure; Johnson *et al.* 2008; Pelicice & Agostinho 2008).  
353 However, this increase in richness in the tropics is suggested to be transient because some studies  
354 demonstrated a rise and fall in richness (humped-shaped non-linear pattern) after impoundment  
355 in the tropics (Agostinho *et al.* 1994; Lima *et al.* 2016), stressing for the need of longer time  
356 series.

### 357 **Impacts on the food web: Less rheophilic, more non-native and predatory species**

358 Our meta-analytic approach suggested a global decrease in rheophilic species (more  
359 pronounced in tropical region), an increase in non-native (except in the boreal region) and an  
360 increase in mean trophic level position (Fig. 2). A decrease in rheophilic species was expected  
361 following the transformation of a lotic to a lentic ecosystem (Gomes & Miranda 2001; Agostinho  
362 *et al.* 2008) due to strong selective pressures in these newly created lentic habitats that should  
363 favor generalists over rheophilic and fluvial specialist species (Li *et al.* 2013). Interestingly, the  
364 strength of trophic interactions and the observed increase in predatory fish in reservoirs can also  
365 contribute to the decrease of rheophilic species. Increased predator densities have been suggested  
366 to reduce migration success of small-bodied stream fishes (Matthews & Marsh-Matthews, 2007;  
367 Franssen, 2012).

368 The general increase in the trophic level position can be due to an increase in predatory  
369 fish (higher trophic level position), a decrease in benthivorous and planktivorous fish (lower  
370 trophic position) or to both mechanisms. Because reservoirs are frequently larger and more  
371 accessible to humans relative to natural lakes, they attract significant numbers of recreational  
372 fisherman. Likewise, reservoirs have been subject to intense fish stocking and species  
373 introduction, mainly for piscivores and sport/game fish species (Pelicice & Agostinho 2008).

374 Water drawdown in reservoirs can also favor piscivores by concentrating prey fish (Hulsey 1956;  
375 Ploskey 1986; Nordhaus 1989; Sutela & Vehanen 2008), which can increase the feeding activity  
376 and growth of young and adult piscivores (Heman *et al.* 1969; Zweiacker *et al.* 1972; Johnson &  
377 Andrews 1973; Heisey *et al.* 1980; Herrington *et al.* 2005). Moreover, the trophic surge  
378 following impoundment can also benefit predators by the boom of productivity during and  
379 shortly after impoundment, but this effect might be transient. Lastly, the cannibalism observed in  
380 many large predators in reservoirs might keep reservoirs in a predator-dominated state  
381 (McCauley *et al.* 2018) and might confer some stability to the food web (Claessen *et al.* 2004;  
382 McCann 2011).

383         These changes in species assemblages, and how they can impact the structure and the  
384 stability of food webs in reservoirs deserve closer investigation, especially in the tropics where  
385 alterations to species-rich food web are greater, on-going, and not well-understood (Layman *et*  
386 *al.* 2005; Rooney *et al.* 2006). Reservoirs seem to have longer food chains (Hoeinghaus *et al.*  
387 2008; Mercado-Silva *et al.* 2009) and more “weblike” interactions, especially in the presence of  
388 omnivory (Stein *et al.* 1995). The potential impacts of dams on food web stability call for a  
389 better integration of taxonomic, functional and life history trait responses to impoundment at a  
390 global scale (Mérona & Vigouroux 2012; Mims & Olden 2013; Lima *et al.* 2017b) because their  
391 relative importance can change across latitude and in a spatio-temporal context.

### 392 **Mechanistic understanding of the effects of impoundment on fish assemblages**

393         Several hypotheses regarding the mechanisms responsible for the change in biodiversity  
394 and fish assemblages following impoundment have been suggested. As a first exploratory step to  
395 develop a general mechanistic understanding, we extracted the main mechanisms reported by the

396 authors from our 67 references (Fig. 5; Table S1.1). We then classified the 11 identified  
397 mechanisms into three categories: 1) alteration of the hydrological regime, 2) impacts on  
398 connectivity and fish movement and 3) change in food web and trophic interactions (Fig. 5).

399 The alteration of the hydrological regime can affect fish communities by shifting the  
400 ecosystem from a lotic to a lentic one, through changes in discharge and water levels, and by  
401 changing water quality, temperature and sedimentation regimes (Fig. 5). The transformation of  
402 the lotic environment into a lentic environment was the most commonly cited mechanism (69%  
403 of the studies; Fig. 5). The new lentic conditions upstream of the dam and a change in discharge  
404 downstream can adversely affect fluvial specialists and large-river species (Winston *et al.* 1991;  
405 Bonner & Wilde 2000b; Franssen & Tobler 2013; Taylor *et al.* 2014); this mechanism was  
406 clearly illustrated in our meta-analysis by the general decrease in rheophilic species and an  
407 increase in generalists. Water levels fluctuations and winter drawdown can affect fish that  
408 depend on the littoral zone through modification of their feeding, growth and reproduction  
409 (freezing of eggs and larvae, lost of spawning substrate; June 1970; Gafny *et al.* 1992; Kahl *et al.*  
410 2008; Probst *et al.* 2009) and also indirectly through changes in prey availability and quality  
411 (Paller 1997; Furey *et al.* 2006; Aroviita & Hämäläinen 2008; Zohary & Ostrovsky 2011; Stoll  
412 2013). Information on the proportion of benthophages or species inhabiting the littoral zone  
413 would help inform this later mechanism.

414 The modification of the riverscape connectivity by dams can also alter fish assemblages  
415 by limiting the movement of migratory species, by affecting metapopulation dynamics, or by  
416 facilitating invasions by connecting aquatic ecosystems (Dynesius & Nilsson 1994; Fullerton *et*  
417 *al.* 2010). The fragmentation of rivers through the construction of barriers to migration was  
418 another mechanism commonly cited (39% of the studies, Fig. 5). Populations isolated in

419 upstream areas by dams can be subject to extirpation when reproductive failure or high mortality  
420 cannot be counterbalanced by recolonization from downstream sources (Winston *et al.* 1991). On  
421 the other hand, some authors have observed increased colonization of non-native species in  
422 impounded streams (Havel *et al.* 2005; Johnson *et al.* 2008). To capture this mechanism in future  
423 meta-analyses, the proportion of species undergoing migration (anadromous, potamodromous)  
424 needs to be reported more frequently.

425 In addition to a higher susceptibility to propagule pressure, reservoirs are particularly  
426 vulnerable to successful establishment of non-native species (40% of the studies, Fig. 5) because  
427 they are in a perturbed state after impoundment compared to natural lakes (Thornton *et al.* 1990;  
428 Pringle *et al.* 2000; Davis 2003; Didham *et al.* 2007). Several studies have found an increase in  
429 non-native species after impoundment, and often these taxa are piscivorous species that become  
430 quite abundant post-impoundment (Martinez *et al.* 1994b; Quist *et al.* 2005; Guenther & Spacie  
431 2006; Johnson *et al.* 2008; Gido *et al.* 2009; Clavero & Hermoso 2010; Franssen & Tobler  
432 2013). When introduced, they compete with, and can prey upon native species (Li *et al.* 1987,  
433 Minckley *et al.* 1991). Basses are well known to homogenize fish assemblages by eliminating  
434 small-bodied prey species (Jackson 2002) and are very often introduced in temperate reservoirs.  
435 Quist *et al.* (2005) found that the Great Plains river fish assemblage switched from a catostomids  
436 and cyprinids (*i.e.* river specialists) dominated system prior to impoundment to an non-native  
437 species assemblage, mainly dominated by piscivores (*e.g.*, smallmouth bass, walleye, yellow  
438 perch and brown trout).

439 The above-mentioned mechanisms are mostly based on authors opinions and not on  
440 strong quantitative evidence because replication in longitudinal studies is rare. The dominant  
441 mechanisms can also differ according to the location and scale (biomes, location of the sampling

442 station), may be dynamic over time (*i.e.*, differ among the filling phase vs. shortly after or many  
443 years after impoundment) and can be influenced by the particularities of reservoir management  
444 and confounding factors (*i.e.*, stocking, fishing). This summary also enlightens the importance of  
445 moving toward a trait-based approach to get a mechanistic understanding of the effects of  
446 impoundment on fish communities, which needs to be more thoroughly reported in original  
447 research studies.

#### 448 **Limitations and publication bias**

449         The main limitations and/or biases in our synthesis that could affect the interpretation and  
450 strength of evidence are: 1) publication bias, 2) variation in fishing effort and gears, 3) variation  
451 in the duration of the studies, 4) assumption of a linear relationship between time and richness, 5)  
452 calculation of the trophic position in a changing habitat, 6) defining an adequate reference  
453 ecosystem for a reservoir, and 7) the difference in ecosystems size. We addressed the issue of  
454 publication bias with the visual inspection of funnel plots and Spearman rank correlation  
455 examining the effect size in relation to the sample size and duration of the study (Appendix S5).  
456 Funnel plots show an absence of a clear sampling/publication bias in most cases, but we found  
457 few significant Spearman  $r$  values suggesting a bias toward publishing large effect sizes when  
458 sample size is small or study duration is short (Appendix S5). Second, the effort and the fishing  
459 gears used varied across studies, but also among years in some studies. Roughly 41% of the  
460 studies did not have similar effort across years (See Table S1.1) – sometimes using different  
461 fishing gears - and only 23% of the studies reported rarefied richness (*i.e.*, controlling for the  
462 number of samples). Most studies used gill nets, resulting in an underestimation of small littoral  
463 and pelagic species. Third and fourth, the duration of the study also varied among studies and  
464 was much shorter in the tropics. The consequences and implications of these limitations were

465 discussed earlier. Given the predominance of shorter time series, particularly in the tropics, we  
466 assumed a linear relationship between time and richness; with longer time series, nonlinear  
467 modeling would be worth exploring. Fifth, we assumed that the change in habitat brought about  
468 by dam would not change the trophic level position for a given species. However, some studies  
469 have demonstrated that, in altered habitats or those invaded with non-native species, the trophic  
470 level position can change for a species (Vander Zanden *et al.* 1999; Tewfik *et al.* 2016). Our goal  
471 was simply to develop a general assessment of a change in fish assemblages, and we considered  
472 the trophic position provided by Fishbase (Froese & Pauly 2015) as a reasonable proxy to  
473 evaluate if fish get more predatory over time in reservoirs. Follow up studies using more direct  
474 approaches (*e.g.*, stable isotopes) would be worthwhile to investigate this observation more fully.  
475 Finally, what constitutes an adequate reference ecosystem for a reservoir, and the potential  
476 differences in ecosystem sizes among studies and biomes need consideration. In cross-sectional  
477 datasets, the unregulated sites for boreal ecosystems were all lakes whereas unregulated sites  
478 were mainly rivers and streams in temperate (5% lakes, 95% rivers or streams) and tropical  
479 ecosystems (11% lakes, 89% rivers or streams). We need appropriate reference ecosystems to  
480 control for stochasticity and climatic events, but comparing reservoirs to only reference lakes or  
481 only rivers might be inadequate because reservoirs are neither a lake nor a river. Only one study  
482 compared reservoir fish communities with those in rivers and lakes in temperate systems and  
483 found that reservoir communities were more similar to lake vs. river communities (Irz *et al.*  
484 2006). Differences in ecosystem size between reservoirs and lakes is another plausible  
485 explanation for the trophic position and diversity results presented herein, as there is certainly a  
486 well-established body of literature showing that these metrics scale with ecosystem size (Post *et*  
487 *al.* 2000). Similarly, geographic location is known to influence fish richness in lakes (Matuszek

488 & Beggs 1988; Samarasin *et al.* 2014). We clearly see that fish diversity metrics are higher in  
489 tropical sites (even before impoundment), which is consistent with the expected trend. We  
490 believe that part of the effect of ecosystem size is reflected in the regression tree that explores  
491 what variables might explain differences in RE among studies, where we found that catchment  
492 area was the strongest predictor. Awareness of the potential effects associated with ecosystem  
493 size is particularly relevant when investigators are comparing reservoirs to natural lakes. Boreal  
494 reservoirs used in this synthesis were on average 158 times bigger than adjacent reference lakes.  
495 Therefore, richness should be higher in reservoir relative to adjacent reference lakes just based  
496 on their respective size. Empirical and experimental studies going forward would be well advised  
497 to take these factors into consideration.

#### 498 **Concluding remarks**

499       Based on an analysis of 147 longitudinal and 37 cross-sectional studies from a total of 67  
500 references, we present a comprehensive synthesis that quantitatively evaluates the effects of  
501 impoundment on fish biodiversity and species assemblages across three globally-dominant  
502 biomes. Four major insights emerge from our synthesis. First, predictions regarding the impact of  
503 dams on fish communities require a regional perspective. Tropical regions were more affected  
504 and characterized by stronger changes in richness and diversity, and marked increases in non-  
505 native species following impoundment. In contrast, lower amplitude changes were observed in  
506 temperate and boreal reservoirs. Second, the full extent of fish communities' dynamics in  
507 tropical regions remains to be determined as time series here are short. Tropical reservoirs are  
508 young and novel ecosystems, and are still in the non-equilibrium phase. Third, a lack of change  
509 in richness does not mean no change in native species richness. We observed a sharp increase in  
510 non-native species in the tropics that was not observed in boreal ecosystems, and this effect

511 masked changes in the whole fish assemblage. Finally, changes in fish assemblages is a common  
512 feature across regulated ecosystems. We detected a global increase in the trophic level position  
513 and a general decrease in the percentage of rheophilic species. Collectively, we conclude that the  
514 changes in fish assemblages and diversity detected in reservoirs could potentially impact the  
515 stability of the food web, the productivity of these ecosystems, the sustainability of artisanal  
516 fisheries, and the function and ecosystems services (Hoeinghaus *et al.* 2009; Toussaint *et al.*  
517 2016). In light of this global quantitative synthesis, hydropower may be part of the solution to  
518 decarbonize our global economy but will come at substantially higher ecological cost to the  
519 tropics (Ziv *et al.* 2012; Winemiller *et al.* 2016; Pelicice *et al.* 2017). When planning  
520 hydropower development, strategic and transboundary actions should be taken to protect,  
521 conserve and restore fish biodiversity, particularly in the sensitive regions like the tropics.

## 522 **Acknowledgements**

523 This work was supported by a MITACS Elevate scholarship to KT with Hydro-Québec  
524 as an industrial partner. IGE also acknowledges support from the Canada Research Chairs  
525 program. We thank J. Caumartin (Hydro-Québec), J.-C., Guay (Hydro-Québec), P. Johnston  
526 (Hydro-Québec), C. Solomon (Cary Institute), C. Martin (UQTR), A. Tremblay (Hydro-Québec)  
527 and B. Vanier (Hydro-Québec) for helpful suggestions and comments on an early draft of this  
528 manuscript.

## 529 **References**

530 Abell, R., Thieme, M.L., Revenga, C., Bryer, M., Kottelat, M., Bogutskaya, N., *et al.* (2008).  
531 Freshwater Ecoregions of the World: A New Map of Biogeographic Units for Freshwater  
532 Biodiversity Conservation. *BioScience*, 58, 403–414.



- 533 Agostinho, A.A., Julio Jr, H.F. & Petrere Jr., M. (1994). Itaipu Reservoir (Brazil): Impacts of  
534 the Impoundment on the Fish Fauna and Fisheries. In: *Rehabilitation of Freshwater*  
535 *Fisheries, by I.G. Cowx*. Fishing news Books, Blackwell Scientific Publications, Osney  
536 Mead, Oxford, UK, pp. 171–184.
- 537 Agostinho, A.A., Pelicice, F.M. & Gomes, L.C. (2008). Dams and the fish fauna of the  
538 Neotropical region: impacts and management related to diversity and fisheries. *Braz. J.*  
539 *Biol.*, 68, 1119–1132.
- 540 Aroviita, J. & Hämäläinen, H. (2008). The impact of water-level regulation on littoral  
541 macroinvertebrate assemblages in boreal lakes. In: *Ecological Effects of Water-Level*  
542 *Fluctuations in Lakes*, Developments in Hydrobiology (eds. Wantzen, K.M., Rothhaupt,  
543 K.-O., Mörtl, M., Cantonati, M., -Tóth, L.G. & Fischer, P.). Springer Netherlands, pp.  
544 45–56.
- 545 Bates, D., Maechler, M., Bolker, B., Walker, S., Christensen, R.H.B., Singmann, H., *et al.*  
546 (2018). *lme4: Linear Mixed-Effects Models using “Eigen” and S4*.
- 547 Baumgartner, L.J., Conallin, J., Wooden, I., Campbell, B., Gee, R., Robinson, W.A., *et al.*  
548 (2014). Using flow guilds of freshwater fish in an adaptive management framework to  
549 simplify environmental flow delivery for semi-arid riverine systems. *Fish Fish.*, 15, 410–  
550 427.
- 551 Bonner, T.H. & Wilde, G.R. (2000). Changes in the Canadian River Fish Assemblage Associated  
552 with Reservoir Construction. *J. Freshw. Ecol.*, 15, 189–198.
- 553 Borenstein, M., Hedges, L.V., Higgins, J.P.T. & Rothstein, H.R. (2009). Front Matter. In:  
554 *Introduction to Meta-Analysis*. John Wiley & Sons, Ltd, pp. i–xxix.

- 555 Buckmeier, D.L., Smith, N.G., Fleming, B.P. & Bodine, K.A. (2014). Intra-Annual Variation in  
556 River–Reservoir Interface Fish Assemblages: Implications for Fish Conservation and  
557 Management in Regulated Rivers. *River Res. Appl.*, 30, 780–790.
- 558 Claessen, D., Roos, A.M. de & Persson, L. (2004). Population dynamic theory of size–dependent  
559 cannibalism. *Proc. R. Soc. Lond. B Biol. Sci.*, 271, 333–340.
- 560 Clavero, M. & Hermoso, V. (2010). Reservoirs promote the taxonomic homogenization of fish  
561 communities within river basins. *Biodivers. Conserv.*, 20, 41–57.
- 562 Davis, M.A. (2003). Biotic Globalization: Does Competition from Introduced Species Threaten  
563 Biodiversity? *BioScience*, 53, 481–489.
- 564 De’ath, G. & Fabricius, K.E. (2000). Classification and regression trees: a powerful yet simple  
565 technique for ecological data analysis. *Ecology*, 81, 3178–3192.
- 566 Didham, R.K., Tylianakis, J.M., Gemmill, N.J., Rand, T.A. & Ewers, R.M. (2007). Interactive  
567 effects of habitat modification and species invasion on native species decline. *Trends*  
568 *Ecol. Evol.*, 22, 489–496.
- 569 Dodds, W.K., Gido, K., Whiles, M.R., Fritz, K.M. & Matthews, W.J. (2004). Life on the Edge:  
570 The Ecology of Great Plains Prairie Streams. *BioScience*, 54, 205–216.
- 571 Dudgeon, D., Arthington, A.H., Gessner, M.O., Kawabata, Z.-I., Knowler, D.J., Lévêque, C., *et*  
572 *al.* (2006). Freshwater biodiversity: importance, threats, status and conservation  
573 challenges. *Biol. Rev.*, 81, 163–182.
- 574 Durham, B.W. & Wilde, G.R. (2011). Influence of Stream Discharge on Reproductive Success  
575 of a Prairie Stream Fish Assemblage. *Trans. Am. Fish. Soc.*, 135, 1644–1653.

- 576 Dynesius, M. & Jansson, R. (2000). Evolutionary consequences of changes in species'  
577 geographical distributions driven by Milankovitch climate oscillations. *Proc. Natl. Acad.*  
578 *Sci.*, 97, 9115–9120.
- 579 Dynesius, M. & Nilsson, C. (1994). Fragmentation and Flow Regulation of River Systems in the  
580 Northern Third of the World. *Science*, 266, 753–762.
- 581 Figueres, C., Schellnhuber, H.J., Whiteman, G., Rockström, J., Hobley, A. & Rahmstorf, S.  
582 (2017). Three years to safeguard our climate. *Nat. News*, 546, 593.
- 583 Franssen, N.R. & Tobler, M. (2013). Upstream effects of a reservoir on fish assemblages  
584 45 years following impoundment. *J. Fish Biol.*, 82, 1659–1670.
- 585 Friedl, G. & Wüest, A. (2002). Disrupting biogeochemical cycles - Consequences of damming.  
586 *Aquat. Sci.*, 64, 55–65.
- 587 Froese, R. & Pauly, D.E. (2015). FishBase. World Wide Web electronic publication.  
588 [www.fishbase.org](http://www.fishbase.org), version (04/2015).
- 589 Fullerton, A.H., Burnett, K.M., Steel, E.A., Flitcroft, R.L., Pess, G.R., Feist, B.E., *et al.* (2010).  
590 Hydrological connectivity for riverine fish: measurement challenges and research  
591 opportunities. *Freshw. Biol.*, 55, 2215–2237.
- 592 Furey, P.C., Nordin, R.N. & Mazumder, A. (2006). Littoral benthic macroinvertebrates under  
593 contrasting drawdown in a reservoir and a natural lake. *J. North Am. Benthol. Soc.*, 25,  
594 19–31.
- 595 Gafny, S., Gasith, A. & Goren, M. (1992). Effect of water level fluctuation on shore spawning of  
596 *Mirogrex terraesanctae* (Steinitz), (Cyprinidae) in Lake Kinneret, Israel. *J. Fish Biol.*, 41,  
597 863–871.

- 598 Gehrke, P.C., Gilligan, D.M. & Barwick, M. (2002). Changes in fish communities of the  
599 Shoalhaven River 20 years after construction of Tallowa Dam, Australia. *River Res.*  
600 *Appl.*, 18, 265–286.
- 601 Gido, K.B., Guy, C.S., Strakosh, T.R., Bernot, R.J., Hase, K.J. & Shaw, M.A. (2002). Long-  
602 Term Changes in the Fish Assemblages of the Big Blue River Basin 40 Years after the  
603 Construction of Tuttle Creek Reservoir. *Trans. Kans. Acad. Sci.*, 105, 193–208.
- 604 Gido, K.B., Schaefer, J.F. & Falke, J.A. (2009). Convergence of fish communities from the  
605 littoral zone of reservoirs. *Freshw. Biol.*, 54, 1163–1177.
- 606 Gomes, L. c. & Miranda, L. e. (2001). Riverine characteristics dictate composition of fish  
607 assemblages and limit fisheries in reservoirs of the upper Paraná River basin. *Regul.*  
608 *Rivers Res. Manag.*, 17, 67–76.
- 609 Griffiths, D. (2006). Pattern and process in the ecological biogeography of European freshwater  
610 fish. *J. Anim. Ecol.*, 75, 734–751.
- 611 Grill, G., Lehner, B., Lumsdon, A.E., MacDonald, G.K., Zarfl, C. & Liermann, C.R. (2015). An  
612 index-based framework for assessing patterns and trends in river fragmentation and flow  
613 regulation by global dams at multiple scales. *Environ. Res. Lett.*, 10, 015001.
- 614 Gubiani, É.A., Gomes, L.C., Agostinho, A.A. & Baumgartner, G. (2010). Variations in fish  
615 assemblages in a tributary of the upper Paraná River, Brazil: A comparison between pre  
616 and post-closure phases of dams. *River Res. Appl.*, 26, 848–865.
- 617 Guenther, C.B. & Spacie, A. (2006). Changes in Fish Assemblage Structure Upstream of  
618 Impoundments within the Upper Wabash River Basin, Indiana. *Trans. Am. Fish. Soc.*,  
619 135, 570–583.

- 620 Gurevitch, J., Koricheva, J., Nakagawa, S. & Stewart, G. (2018). Meta-analysis and the science  
621 of research synthesis. *Nature*, 555, 175–182.
- 622 Havel, J.E., Lee, C.E. & Zanden, J.M.V. (2005). Do Reservoirs Facilitate Invasions into  
623 Landscapes? *BioScience*, 55, 518–525.
- 624 Hedges, L.V., Tipton, E. & Johnson, M.C. (2010). Robust variance estimation in meta-regression  
625 with dependent effect size estimates. *Res. Synth. Methods*, 1, 39–65.
- 626 Heisey, P.G., Mathur, D. & Magnusson, N.C. (1980). Accelerated Growth of Smallmouth Bass  
627 in a Pumped Storage System. *Trans. Am. Fish. Soc.*, 109, 371–377.
- 628 Heman, L.M., Campbell, R.S. & Redmond, L.C. (1969). Manipulation of Fish Populations  
629 Through Reservoir Drawdown. *Trans. Am. Fish. Soc.*, 98, 293–304.
- 630 Herrington, S.J., Herrington, K.J., Herod, H.B. & Harrison, D. (2005). Fishery Dynamics of  
631 Macrophyte- dominated Banks Lake National Wildlife Refuge, Georgia. *Proc. Southeast.  
632 Assoc. Fish Wildl. Agencies*, 59, 292–302.
- 633 Hillebrand, H. & Cardinale, B.J. (2010). A critique for meta-analyses and the productivity–  
634 diversity relationship. *Ecology*, 91, 2545–2549.
- 635 Hoeninghaus, D.J., Agostinho, A.A., Gomes, L.C., Pelicice, F.M., Okada, E.K., Latini, J.D., *et al.*  
636 (2009). Effects of River Impoundment on Ecosystem Services of Large Tropical Rivers:  
637 Embodied Energy and Market Value of Artisanal Fisheries. *Conserv. Biol.*, 23, 1222–  
638 1231.
- 639 Hoeninghaus, D.J., Winemiller, K.O. & Agostinho, A.A. (2008). Hydrogeomorphology and river  
640 impoundment affect food-chain length of diverse Neotropical food webs. *Oikos*, 117,  
641 984–995.

- 642 Hulsey, A.H. (1956). Effects Of A Fall And Winter Drawdown On A Flood Control Lake. *Proc.*  
643 *Southeast. Assoc. Fish Wildl. Agencies*, 10, 285–289.
- 644 Irz, P., Odion, M., Argillier, C. & Pont, D. (2006). Comparison between the fish communities of  
645 lakes, reservoirs and rivers: can natural systems help define the ecological potential of  
646 reservoirs? *Aquat. Sci.*, 68, 109–116.
- 647 Jackson, D.A. (2002). Ecological effects of Micropterus Introductions: the dark side of black  
648 bass. In: *American Fisheries Society Symposium 31*, Black Bass: Ecology, Conservation,  
649 and Management. Bethesda, Maryland, USA, pp. 221–232.
- 650 Jeschke, J.M., Bacher, S., Blackburn, T.M., Dick, J.T.A., Essl, F., Evans, T., *et al.* (2014).  
651 Defining the Impact of Non-Native Species. *Conserv. Biol.*, 28, 1188–1194.
- 652 Johnson, J.N. & Andrews, A.K. (1973). Growth of White Crappie and Channel Catfish in  
653 Relation to Variations in Mean Annual Water Level of Lake Carl Blackwell, Oklahoma.  
654 *Proc. Southeast. Assoc. Fish Wildl. Agencies*, 27, 767–776.
- 655 Johnson, P.T., Olden, J.D. & Vander Zanden, M.J. (2008). Dam invaders: impoundments  
656 facilitate biological invasions into freshwaters. *Front. Ecol. Environ.*, 6, 357–363.
- 657 Júlio, H.F.J., Ferreira, H., Tós, C.D., Agostinho, Â.A. & Pavanelli, C.S. (2009). A massive  
658 invasion of fish species after eliminating a natural barrier in the upper rio Paraná basin.  
659 *Neotropical Ichthyol.*, 7, 709–718.
- 660 June, F.C. (1970). Atresia and Year-Class Abundance of Northern Pike, *Esox lucius*, in Two  
661 Missouri River Impoundments. *J. Fish. Res. Board Can.*, 27, 587–591.
- 662 Kahl, U., Hülsmann, S., Radke, R.J. & Benndorf, J. (2008). The impact of water level  
663 fluctuations on the year class strength of roach: Implications for fish stock management.  
664 *Limnol. - Ecol. Manag. Inland Waters*, 38, 258–268.

- 665 Kenward, M.G. & Roger, J.H. (1997). Small Sample Inference for Fixed Effects from Restricted  
666 Maximum Likelihood. *Biometrics*, 53, 983–997.
- 667 Kroger, R.L. (1973). Biological Effects of Fluctuating Water Levels in the Snake River, Grand  
668 Teton National Park, Wyoming. *Am. Midl. Nat.*, 89, 478–481.
- 669 Layman, C.A., Winemiller, K.O., Arrington, D.A. & Jepsen, D.B. (2005). Body Size and  
670 Trophic Position in a Diverse Tropical Food Web. *Ecology*, 86, 2530–2535.
- 671 Lévêque, C., Oberdorff, T., Paugy, D., Stiassny, M.L.J. & Tedesco, P.A. (2008). Global diversity  
672 of fish (Pisces) in freshwater. *Hydrobiologia*, 595, 545–567.
- 673 Li, J., Dong, S., Peng, M., Yang, Z., Liu, S., Li, X., *et al.* (2013). Effects of damming on the  
674 biological integrity of fish assemblages in the middle Lancang-Mekong River basin.  
675 *Ecol. Indic.*, 34, 94–102.
- 676 Liao, C., Peng, R., Luo, Y., Zhou, X., Wu, X., Fang, C., *et al.* (2007). Altered ecosystem carbon  
677 and nitrogen cycles by plant invasion: a meta-analysis. *New Phytol.*, 177, 706–714.
- 678 Liermann, C.R., Nilsson, C., Robertson, J. & Ng, R.Y. (2012). Implications of Dam Obstruction  
679 for Global Freshwater Fish Diversity. *BioScience*, 62, 539–548.
- 680 Liew, J.H., Tan, H.H. & Yeo, D.C.J. (2016). Dammed rivers: impoundments facilitate fish  
681 invasions. *Freshw. Biol.*, 61, 1421–1429.
- 682 Lima, A.C., Agostinho, C.S., Sayanda, D., Pelicice, F.M., Soares, A.M.V.M. & Monaghan, K.A.  
683 (2016). The rise and fall of fish diversity in a neotropical river after impoundment.  
684 *Hydrobiologia*, 763, 207–221.
- 685 Lima, A.C., Sayanda, D., Agostinho, C.S., Machado, A.L., Soares, A.M.V.M. & Monaghan,  
686 K.A. (2017a). Using a trait-based approach to measure the impact of dam closure in fish  
687 communities of a Neotropical River. *Ecol. Freshw. Fish*, n/a-n/a.

- 688 Lima, A.C., Wrona, F.J. & Soares, A.M.V.M. (2017b). Fish traits as an alternative tool for the  
689 assessment of impacted rivers. *Rev. Fish Biol. Fish.*, 27, 31–42.
- 690 Liu, Z., Guan, D., Crawford-Brown, D., Zhang, Q., He, K. & Liu, J. (2013). *Energy policy: A*  
691 *low-carbon road map for China. Nature*. Available at:  
692 <http://www.nature.com/articles/500143a>. Last accessed 18 May 2018.
- 693 Lüdecke, D. & Schwemmer, C. (2018). *sjPlot: Data Visualization for Statistics in Social*  
694 *Science*.
- 695 Martinez, P.J., Chart, T.E., Trammell, M.A., Wullschleger, J.G. & Bergersen, E.P. (1994a). Fish  
696 species composition before and after construction of a main stem reservoir on the White  
697 River, Colorado. *Environ. Biol. Fishes*, 40, 227–239.
- 698 Martinez, P.J., Chart, T.E., Trammell, M.A., Wullschleger, J.G. & Bergersen, E.P. (1994b). Fish  
699 species composition before and after construction of a main stem reservoir on the White  
700 River, Colorado. *Environ. Biol. Fishes*, 40, 227–239.
- 701 Matuszek, J.E. & Beggs, G.L. (1988). Fish Species Richness in Relation to Lake Area, pH, and  
702 Other Abiotic Factors in Ontario Lakes. *Can. J. Fish. Aquat. Sci.*, 45, 1931–1941.
- 703 McCann, K.S. (2011). *Food Webs (MPB-50)*. Princeton University Press.
- 704 McCauley, D.J., Gellner, G., Martinez, N.D., Williams, R.J., Sandin, S.A., Micheli, F., *et al.*  
705 (2018). On the prevalence and dynamics of inverted trophic pyramids and otherwise top-  
706 heavy communities. *Ecol. Lett.*, 21, 439–454.
- 707 Mercado-Silva, N., Helmus, M.R. & Zanden, M.J.V. (2009). The effects of impoundment and  
708 non-native species on a river food web in Mexico’s central plateau. *River Res. Appl.*, 25,  
709 1090–1108.



- 710 de Mérona, B. de, Vigouroux, R. & Tejerina-Garro, F.L. (2005). Alteration of Fish Diversity  
711 Downstream from Petit-Saut Dam in French Guiana. Implication of Ecological Strategies  
712 of Fish Species. *Hydrobiologia*, 551, 33–47.
- 713 de Mérona, B. de & Vigouroux, R. (2012). The role of ecological strategies in the colonization  
714 success of pelagic fish in a large tropical reservoir (Petit-Saut Reservoir, French Guiana).  
715 *Aquat. Living Resour.*, 25, 41–54.
- 716 Messager, M.L., Lehner, B., Grill, G., Nedeva, I. & Schmitt, O. (2016). Estimating the volume  
717 and age of water stored in global lakes using a geo-statistical approach. *Nat. Commun.*, 7,  
718 13603.
- 719 Mims, M.C. & Olden, J.D. (2013). Fish assemblages respond to altered flow regimes via  
720 ecological filtering of life history strategies. *Freshw. Biol.*, 58, 50–62.
- 721 Moher, D., Liberati, A., Tetzlaff, J., Altman, D.G. & Group, T.P. (2009). Preferred Reporting  
722 Items for Systematic Reviews and Meta-Analyses: The PRISMA Statement. *PLOS Med.*,  
723 6, e1000097.
- 724 Nilsson, C., Reidy, C.A., Dynesius, M. & Revenga, C. (2005). Fragmentation and Flow  
725 Regulation of the World's Large River Systems. *Science*, 308, 405–408.
- 726 Nordhaus, J.J. (1989). Estimating the Effects of a North Florida Reservoir Drawdown Utilizing  
727 Creel Data. *Proc. Southeast. Assoc. Fish Wildl. Agencies*, 43, 29–35.
- 728 Paller, M.H. (1997). Recovery of a Reservoir Fish Community from Drawdown Related Impacts.  
729 *North Am. J. Fish. Manag.*, 17, 726–733.
- 730 Pelicice, F.M. & Agostinho, A.A. (2008). Fish fauna destruction after the introduction of a non-  
731 native predator (*Cichla kelberi*) in a Neotropical reservoir. *Biol. Invasions*, 11, 1789–  
732 1801.

- 733 Pelicice, F.M., Azevedo □ Santos, V.M., Vitule, J.R.S., Orsi, M.L., Junior, D.P.L., Magalhães,  
734 A.L.B., *et al.* (2017). Neotropical freshwater fishes imperilled by unsustainable policies.  
735 *Fish Fish.*, 18, 1119–1133.
- 736 Pelicice, F.M., Pompeu, P.S. & Agostinho, A.A. (2015). Large reservoirs as ecological barriers  
737 to downstream movements of Neotropical migratory fish. *Fish Fish.*, 16, 697–715.
- 738 Ploskey, G.R. (1986). Effects of water-level changes on reservoir ecosystems, with implications  
739 for fisheries management. In: *Reservoir Fisheries Management: Strategies for the 80's*.  
740 Reservoir Committee, Southern Division American Fisheries Society, Bethesda,  
741 Maryland, pp. 86–97.
- 742 Poff, N.L., Olden, J.D., Merritt, D.M. & Pepin, D.M. (2007). Homogenization of regional river  
743 dynamics by dams and global biodiversity implications. *Proc. Natl. Acad. Sci.*, 104,  
744 5732–5737.
- 745 Post, D.M., Pace, M.L. & Hairston, N.G. (2000). Ecosystem size determines food-chain length in  
746 lakes. *Nature*, 405, 1047–1049.
- 747 Potvin, C., Burch, S., Layzell, D., Meadowcroft, J., Mousseau, N., Dale, A., *et al.* (2017). *Re-*  
748 *energizing Canada. Pathways to a low-carbon future* ( No. NRCan Energy Consultation  
749 Report).
- 750 Pringle, C.M., Freeman, M.C. & Freeman, B.J. (2000). Regional Effects of Hydrologic  
751 Alterations on Riverine Macrobiota in the New World: Tropical-Temperate Comparisons.  
752 *BioScience*, 50, 807–823.
- 753 Probst, W.N., Stoll, S., Peters, L., Fischer, P. & Eckmann, R. (2009). Lake water level increase  
754 during spring affects the breeding success of bream *Abramis brama* (L.). *Hydrobiologia*,  
755 632, 211–224.

- 756 Pyron, M., Vaughn, C.C., Winston, M.R. & Pigg, J. (1998). Fish Assemblage Structure from 20  
757 Years of Collections in the Kiamichi River, Oklahoma. *Southwest. Nat.*, 43, 336–343.
- 758 Quinn, J.W. & Kwak, T.J. (2003). Fish Assemblage Changes in an Ozark River after  
759 Impoundment: A Long-Term Perspective. *Trans. Am. Fish. Soc.*, 132, 110–119.
- 760 Quist, M.C., Hubert, W.A. & Rahel, F.J. (2005). Fish assemblage structure following  
761 impoundment of a Great Plains river. *West. North Am. Nat.*, 65, 53–63.
- 762 R Core Team. (2017). R: A language and environment for statistical computing. R Foundation  
763 for Statistical Computing, Vienna, Austria. URL <https://www.R-project.org/>.
- 764 Rahel, F.J. (2000). Homogenization of Fish Faunas Across the United States. *Science*, 288, 854–  
765 856.
- 766 Rahel, F.J. (2002). Homogenization of Freshwater Faunas. *Annu. Rev. Ecol. Syst.*, 33, 291–315.
- 767 Rey Benayas, J.M., Newton, A.C., Diaz, A. & Bullock, J.M. (2009). Enhancement of  
768 Biodiversity and Ecosystem Services by Ecological Restoration: A Meta-Analysis.  
769 *Science*, 325, 1121–1124.
- 770 Reyes-Gavilán, F.G., Garrido, R., Nicieza, A.G., Toledo, M.M. & Braña, F. (1996). Fish  
771 community variation along physical gradients in short streams of northern Spain and the  
772 disruptive effect of dams. *Hydrobiologia*, 321, 155–163.
- 773 Rohatgi, A. (2018). *WebPlotDigitizer*.
- 774 Rooney, N., McCann, K., Gellner, G. & Moore, J.C. (2006). Structural asymmetry and the  
775 stability of diverse food webs. *Nature*, 442, 265–269.
- 776 Rosenberg, D.M., Berkes, F., Bodaly, R.A., Hecky, R.E., Kelly, C.A. & Rudd, J.W. (1997).  
777 Large-scale impacts of hydroelectric development. *Environ. Rev.*, 5, 27–54.

- 778 Rosenberg, M.S., Adams, D.C. & Gurevitch, J. (2000). *Metawin: Statistical software for meta-*  
779 *analysis with resampling tests*. Metawin: Statistical software for meta-analysis with  
780 resampling tests. Sinauer Associates, Sunderland, MA, US.
- 781 Samarasin, P., Minns, C.K., Shuter, B.J., Tonn, W.M. & Rennie, M.D. (2014). Fish diversity and  
782 biomass in northern Canadian lakes: northern lakes are more diverse and have greater  
783 biomass than expected based on species–energy theory. *Can. J. Fish. Aquat. Sci.*, 72,  
784 226–237.
- 785 Sá-Oliveira, J.C., Hawes, J.E., Isaac-Nahum, V.J. & Peres, C.A. (2015). Upstream and  
786 downstream responses of fish assemblages to an eastern Amazonian hydroelectric dam.  
787 *Freshw. Biol.*, 60, 2037–2050.
- 788 Schluter, D. & Rambaut, A. (1996). Ecological Speciation in Postglacial Fishes [and  
789 Discussion]. *Philos. Trans. Biol. Sci.*, 351, 807–814.
- 790 Scott, W.B. & Crossman, E.J. (1973). *Freshwater Fishes of Canada*. Fisheries Research Board  
791 of Canada.
- 792 Stanford, J.A., Ward, J.V., Liss, W.J., Frissell, C.A., Williams, R.N., Lichatowich, J.A., *et al.*  
793 (1996). A General Protocol for Restoration of Regulated Rivers. *Regul. Rivers Res.*  
794 *Manag.*, 12, 391–413.
- 795 Stein, R.A., DeVries, D.R. & Dettmers, J.M. (1995). Food-web regulation by a planktivore:  
796 exploring the generality of the trophic cascade hypothesis. *Can. J. Fish. Aquat. Sci.*, 52,  
797 2518–2526.
- 798 Stickler, C.M., Coe, M.T., Costa, M.H., Nepstad, D.C., McGrath, D.G., Dias, L.C.P., *et al.*  
799 (2013). Dependence of hydropower energy generation on forests in the Amazon Basin at  
800 local and regional scales. *Proc. Natl. Acad. Sci.*, 110, 9601–9606.

- 801 Stoll, S. (2013). Complex interactions between pre-spawning water level increase, trophic state  
802 and spawning stock biomass determine year-class strength in a shallow-water-spawning  
803 fish. *J. Appl. Ichthyol.*, 29, 617–622.
- 804 Strayer, D.L. & Dudgeon, D. (2010). Freshwater biodiversity conservation: recent progress and  
805 future challenges. *J. North Am. Benthol. Soc.*, 29, 344–358.
- 806 Sutela, T. & Vehanen, T. (2008). Effects of water-level regulation on the nearshore fish  
807 community in boreal lakes. *Hydrobiologia*, 613, 13–20.
- 808 Taylor, C.A., Knouft, J.H. & Hiland, T.M. (2001). Consequences of stream impoundment on fish  
809 communities in a small North American drainage. *Regul. Rivers Res. Manag.*, 17, 687–  
810 698.
- 811 Taylor, J.M., Seilheimer, T.S. & Fisher, W.L. (2014). Downstream fish assemblage response to  
812 river impoundment varies with degree of hydrologic alteration. *Hydrobiologia*, 728, 23–  
813 39.
- 814 Teodoru, C.R., Bastien, J., Bonneville, M.-C., del Giorgio, P.A., Demarty, M., Garneau, M., *et*  
815 *al.* (2012). The net carbon footprint of a newly created boreal hydroelectric reservoir.  
816 *Glob. Biogeochem. Cycles*, 26, GB2016.
- 817 Tewfik, A., Bell, S.S., McCann, K.S. & Morrow, K. (2016). Predator Diet and Trophic Position  
818 Modified with Altered Habitat Morphology. *PLOS ONE*, 11, e0147759.
- 819 Therneau, T., Atkinson, B., port, B.R. (producer of the initial R. & maintainer 1999-2017).  
820 (2018). *rpart: Recursive Partitioning and Regression Trees*.
- 821 Thornton, K.W., Kimmel, B.L. & Payne, F.E. (1990). *Reservoir Limnology: Ecological*  
822 *Perspectives*. John Wiley & Sons.

- 823 Toussaint, A., Charpin, N., Brosse, S. & Villéger, S. (2016). Global functional diversity of  
824 freshwater fish is concentrated in the Neotropics while functional vulnerability is  
825 widespread. *Sci. Rep.*, 6, srep22125.
- 826 Travnichek, V.H. & Maceina, M.J. (1994). Comparison of Flow Regulation Effects on Fish  
827 Assemblages in Shallow and Deep Water Habitats in the Tallapoosa River, Alabama. *J.*  
828 *Freshw. Ecol.*, 9, 207–216.
- 829 Turgeon, K., Turpin, C. & Gregory-Eaves, I. (2018). Boreal river impoundments caused  
830 nearshore fish community assemblage shifts but little change in diversity: A multi-scale  
831 analysis. *Can. J. Fish. Aquat. Sci.*, In press.
- 832 Vander Zanden, M.J., Casselman, J.M. & Rasmussen, J.B. (1999). Stable isotope evidence for  
833 the food web consequences of species invasions in lakes. *Nature*, 401, 464–467.
- 834 Verpoorter, C., Kutser, T., Seekell, D.A. & Tranvik, L.J. (2014). A global inventory of lakes  
835 based on high-resolution satellite imagery. *Geophys. Res. Lett.*, 41, 2014GL060641.
- 836 Vilà, M., Espinar, J.L., Hejda, M., Hulme, P.E., Jarošík, V., Maron, J.L., *et al.* (2011). Ecological  
837 impacts of invasive alien plants: a meta-analysis of their effects on species, communities  
838 and ecosystems. *Ecol. Lett.*, 14, 702–708.
- 839 Villéger, S., Blanchet, S., Beauchard, O., Oberdorff, T. & Brosse, S. (2011). Homogenization  
840 patterns of the world's freshwater fish faunas. *Proc. Natl. Acad. Sci.*, 108, 18003–18008.
- 841 Vitule, J.R.S., Skóra, F. & Abilhoa, V. (2012). Homogenization of freshwater fish faunas after  
842 the elimination of a natural barrier by a dam in Neotropics. *Divers. Distrib.*, 18, 111–120.
- 843 Vörösmarty, C.J., McIntyre, P.B., Gessner, M.O., Dudgeon, D., Prusevich, A., Green, P., *et al.*  
844 (2010). Global threats to human water security and river biodiversity. *Nature*, 467, 555–  
845 561.

- 846 Ward, J.V. & Stanford, J.A. (1995). The serial discontinuity concept: Extending the model to  
847 floodplain rivers. *Regul. Rivers Res. Manag.*, 10, 159–168.
- 848 Welcomme, R.L. (2000). Fish biodiversity in floodplains and their associated rivers. In:  
849 *Biodiversity in wetlands: assessment, function and conservation* (eds. Gopal, B., Junk,  
850 W.J. & Davis, J.A.). Backhuys.
- 851 Winemiller, K.O., McIntyre, P.B., Castello, L., Fluet-Chouinard, E., Giarrizzo, T., Nam, S., *et al.*  
852 (2016). Balancing hydropower and biodiversity in the Amazon, Congo, and Mekong.  
853 *Science*, 351, 128–129.
- 854 Winston, M.R., Taylor, C.M. & Pigg, J. (1991). Upstream Extirpation of Four Minnow Species  
855 Due to Damming of a Prairie Stream. *Trans. Am. Fish. Soc.*, 120, 98–105.
- 856 Winters, L.K. & Budy, P. (2015). Exploring Crowded Trophic Niche Space in a Novel Reservoir  
857 Fish Assemblage: How Many is Too Many? *Trans. Am. Fish. Soc.*, 144, 1117–1128.
- 858 Ziv, G., Baran, E., Nam, S., Rodríguez-Iturbe, I. & Levin, S.A. (2012). Trading-off fish  
859 biodiversity, food security, and hydropower in the Mekong River Basin. *Proc. Natl.*  
860 *Acad. Sci.*, 109, 5609–5614.
- 861 Zohary, T. & Ostrovsky, I. (2011). Ecological impacts of excessive water level fluctuations in  
862 stratified freshwater lakes. *Inland Waters*, 1, 47–59.
- 863 Zweiacker, P.L., Summerfelt, R.C. & Johnson, J.N. (1972). Largemouth Bass Growth In  
864 Relationship To Annual Variations In Mean Pool Elevations In Lake Carl Blackwell,  
865 Oklahoma. *Proc. Southeast. Assoc. Fish Wildl. Agencies*, 26, 530–540.



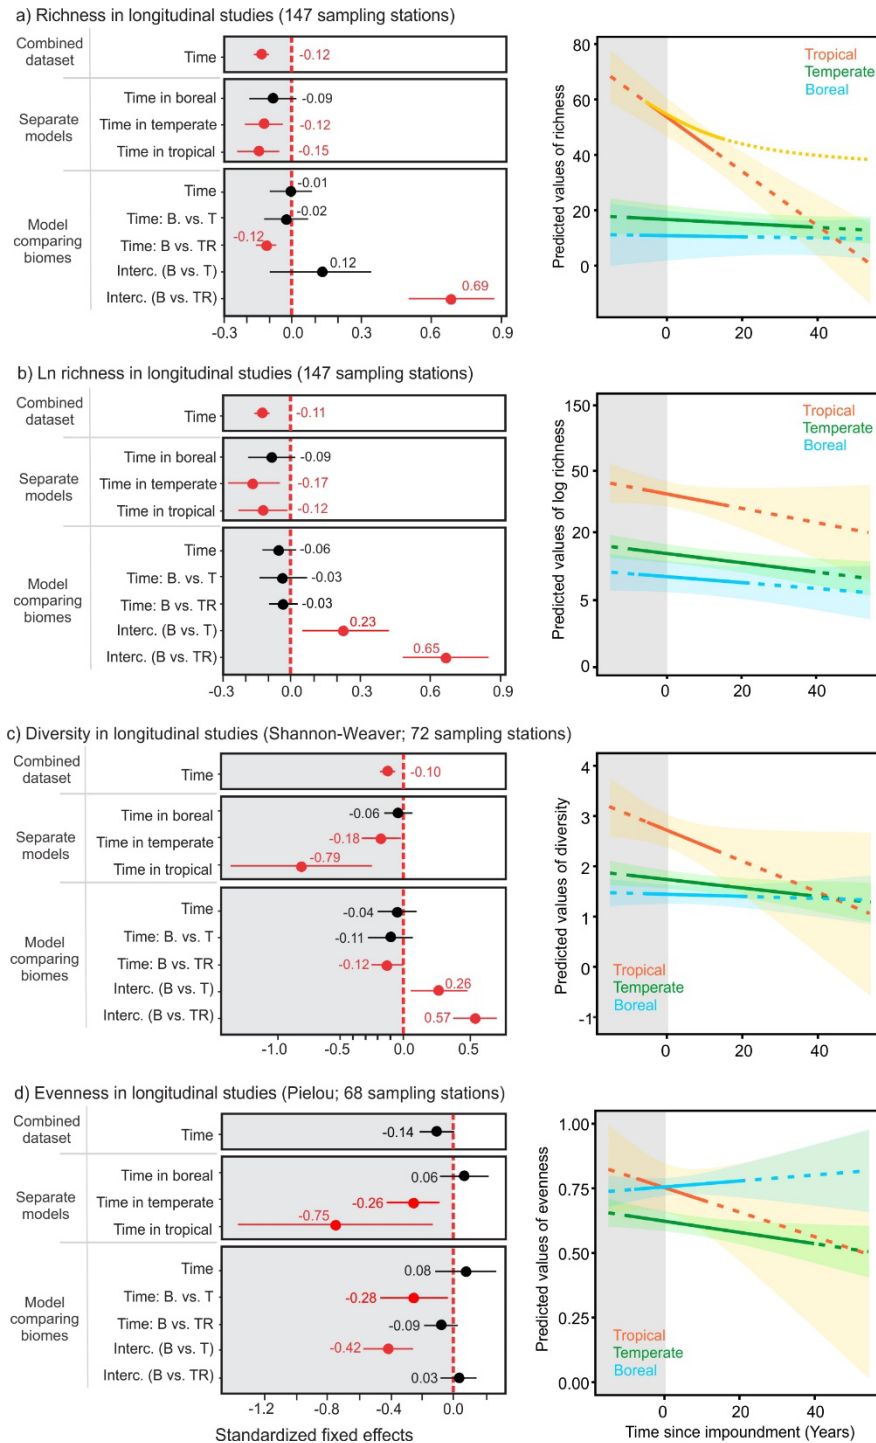

**Figure 1. Standardized effect size in longitudinal studies for taxonomic metrics.** *Left panels:* Standardized fixed effects coefficients and standard error from the mixed effects models comparing the temporal trends in a) richness, b) *ln* richness, c) diversity, and d) evenness across biomes. For each taxonomic metric, we showed the effect of time since impoundment on the metrics for the combined dataset, for each biome modelled separately, and we also compared biomes in the model by using an interaction between biome and time (Time: B vs. T and Time: B vs. TR, using boreal (B) as the contrast). The 95% CI were evaluated with the Kenward Roger approximation. Coefficients in red represent significant patterns for a given fixed effect. *Right panels:* Models predictions from the model comparing the effect of time since impoundment on taxonomic metrics across biomes (model with the interaction). The solid lines represent the predictions where we have actual data and the dotted lines represent model extrapolation. In a), the non-linear curve in the tropics is a more plausible pattern but cannot be modeled.



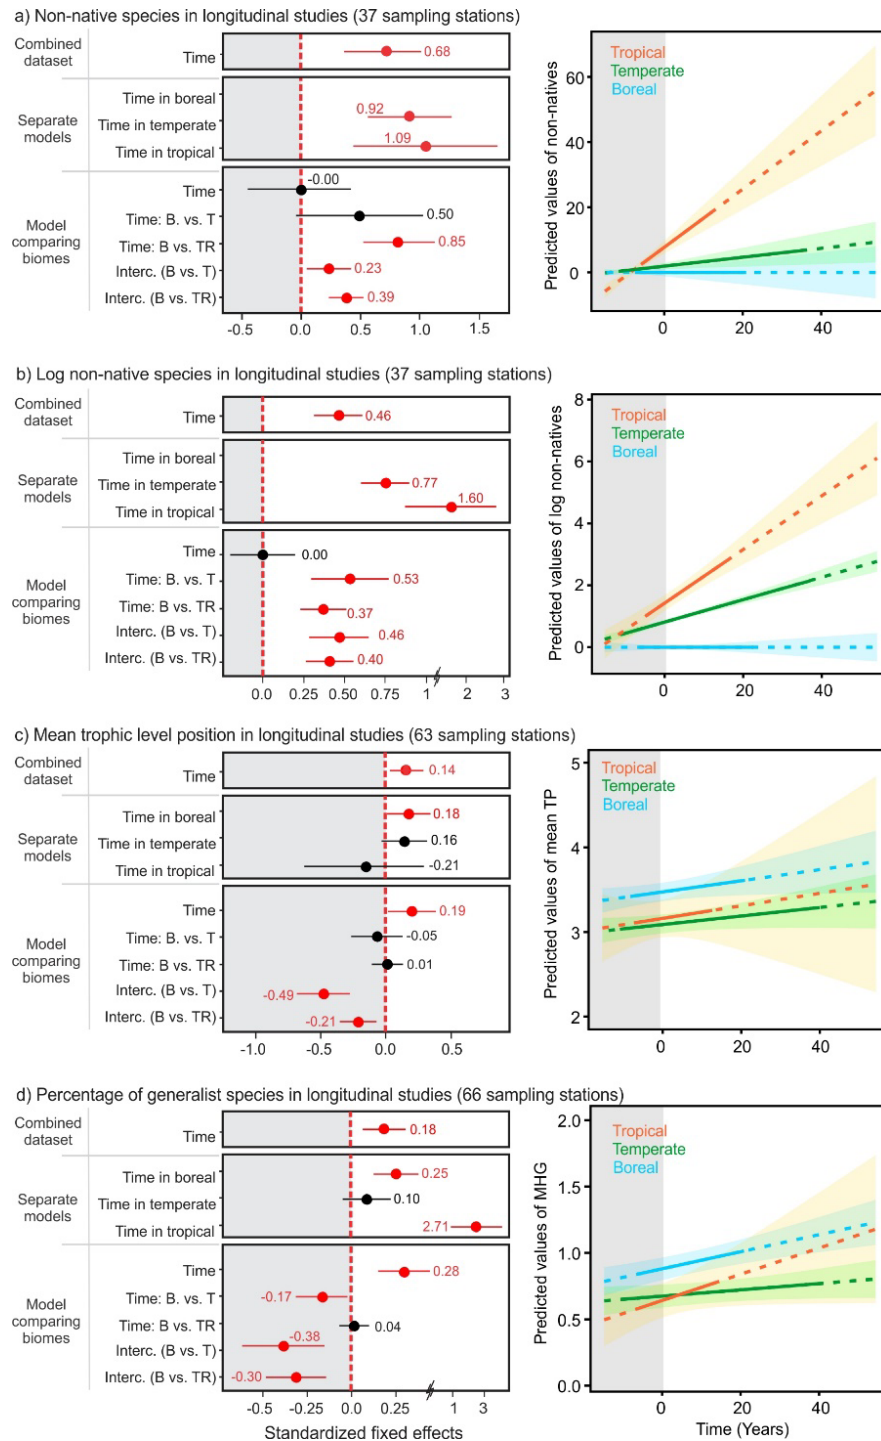

**Figure 2. Standardized effect size in longitudinal studies for taxonomic metrics.** *Left panels:* Standardized fixed effects coefficients and standard error from the mixed effects models comparing the temporal trends in a) number of non-native species, b)  $\ln$  number of non-native species, c) mean trophic level position, and d) percentage of generalist species across biomes. For each taxonomic metric, we showed the effect of time since impoundment on the metrics for the combined dataset, for each biome modelled separately, and we also compared biomes in the model by using an interaction between biome and time (Time: B vs. T and Time: B vs. TR, using boreal (B) as the contrast). The 95% CI were evaluated with the Kenward Roger approximation. Coefficients in red represent significant patterns for a given fixed effect. *Right panels:* Models predictions from the model comparing the effect of time since impoundment on taxonomic metrics across biomes (model with the interaction). The solid lines represent the predictions where we have actual data and the dotted lines represent model extrapolation.

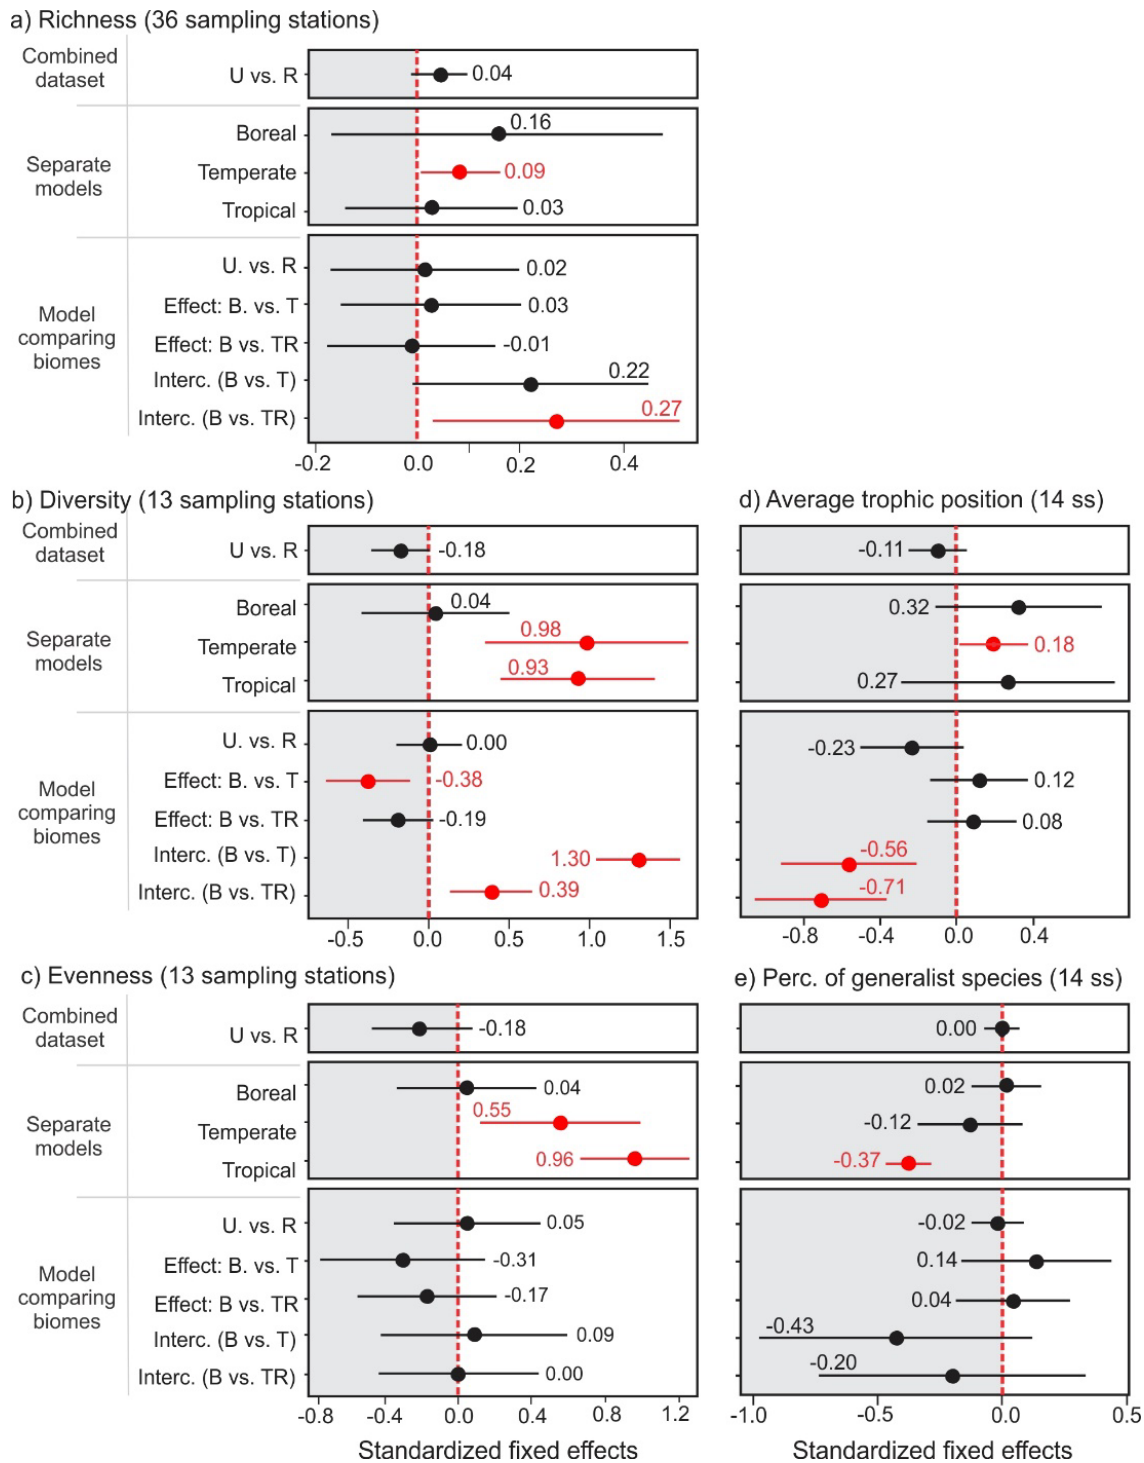

**Figure 3. Standardized effect size in cross-sectional studies for taxonomic and fish assemblage metrics.**

Standardized fixed effects coefficients and standard error from the mixed effects models comparing the temporal trends in a) richness, b) diversity, c) evenness, d) mean trophic level position, and e) percentage of generalist species across biomes. Positive deviations in standardized fixed effects represent cases where the regulated ecosystems had higher values relative to the unregulated ecosystems. For each metric, we showed the difference between regulated (R) and unregulated ecosystems (U) on the metrics for the combined dataset, for each biome modelled separately, and we also compared biomes in the model by using an interaction between biome and effect (Effect: B vs. T and Effect: B vs. TR, using boreal (B) as the contrast). The 95% CI were evaluated with the Kenward Roger approximation. Coefficients in red represent significant patterns for a given fixed effect. Coefficients in red represent significant patterns for a given fixed effect.

a) Pruned regression tree

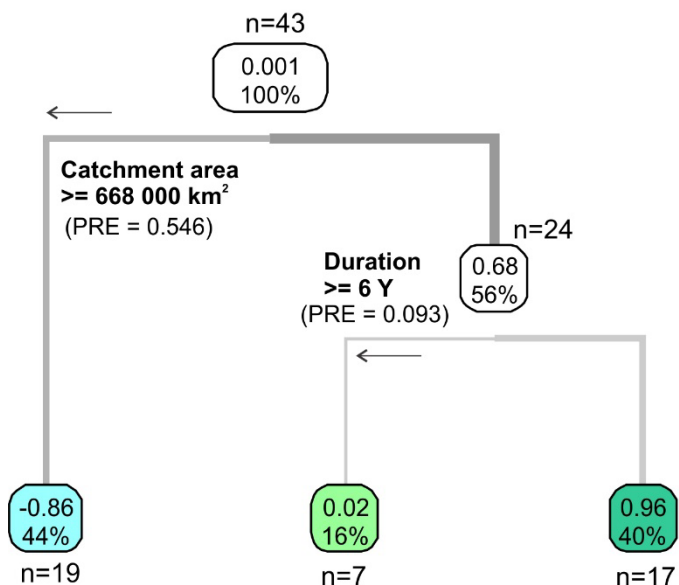

b) Distribution of the sampling stations

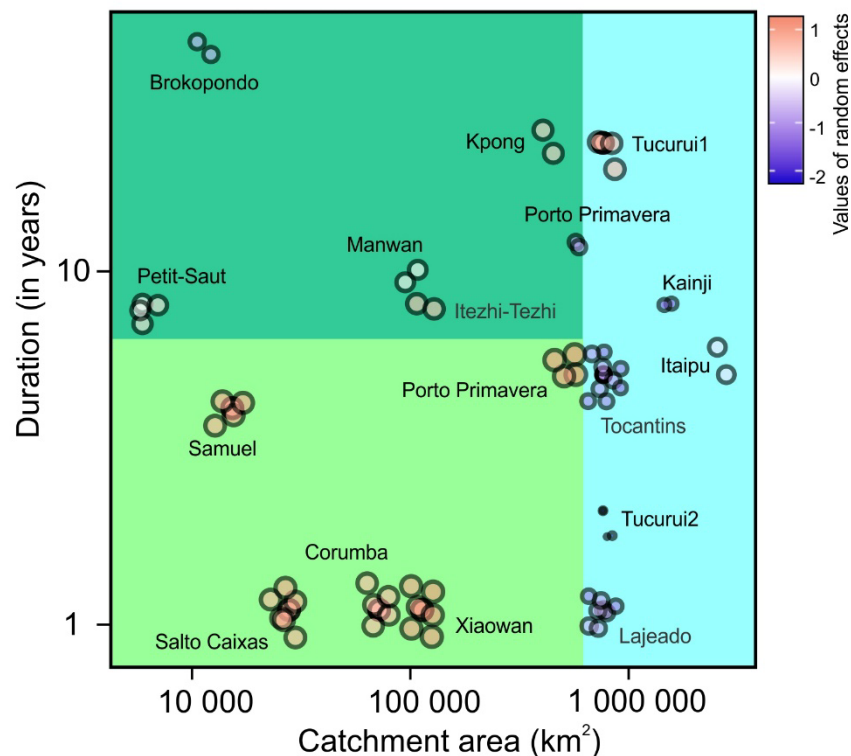

**Figure 4. Regression tree predicting the heterogeneity in random effect values (RE) from the mixed effect model examining the effect of time since impoundment on richness in the tropics.** a) plot of the pruned regression tree showing the mean value and proportion of the dataset in boxes at each step of the tree, and b) distribution of the sampling stations and reservoirs in the catchment area and duration of the studies space. The size and color of the circle represent the RE values of the model (i.e., variation relative to the mean loss of richness in this region). Red means a lower loss in richness relative to the mean loss of richness in this region and an increase in richness in some cases, blue means a higher decrease in richness relative to the mean loss of richness in this region. The different shades area in panel b correspond to data range covered by the three final nodes in the pruned regression tree.

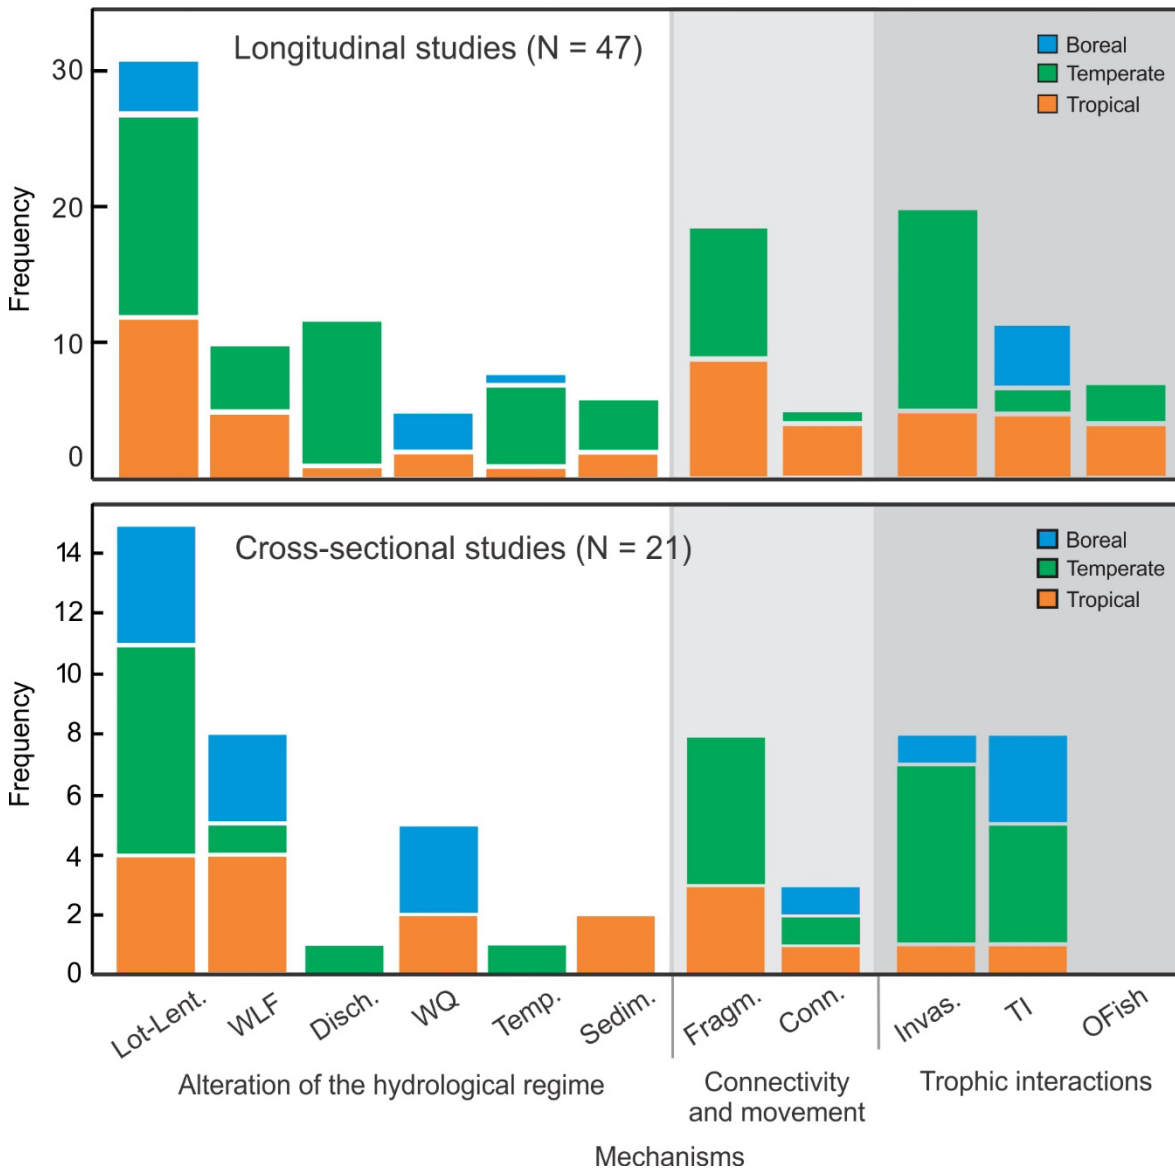

**Figure 5. Summary of the main mechanisms affecting fish biodiversity in a) longitudinal and b) cross-sectional studies.** Frequency distribution of the main mechanisms reported by the authors (in the abstract and/or conclusions) and potentially responsible for the change in fish assemblages observed in the 67 references. The mechanisms were classified into three main classes: Alteration of the hydrological regime, alteration of the connectivity and fish movement, and impacts on the trophic interactions. Lot-Lent. = change from a lotic to lentic condition, WLF = water level fluctuation in the reservoir, Disch. = change in discharge downstream of the dam, WQ = change in water quality excluding temperature, Temp. = change in temperature upstream and downstream of the dam, Sedim. = change in sedimentation regime, Fragn. = dams fragment river dynamics and can create a barrier to movement, Conn. = increased connectivity of the drainage basins, Invas. = increase in the number of invasive species, TI = change in the strength of the trophic interactions (predation and competition), OFish = overfishing of some species.
